# Supplementary material for: Postnatal Right Ventricular Developmental Track Changed by Volume Overload
Source: PubMed Central journal article supplement — J Am Heart Assoc. 2021 Aug 13;10(16):e020854. doi: 10.1161/JAHA.121.020854 (PMC8475045; doi:10.1161/jaha.121.020854), 2021-08-13
Supplement: JAH3-10-e020854-s002.pdf [file JAH3-10-e020854-s002.pdf]

# **SUPPLEMENTAL MATERIAL**

**Table S1. Primer information.**

| Gene          |         | Sequence (5'->3')       |
|---------------|---------|-------------------------|
| Slc41a3       | Forward | CTCAGCCTTGAGTTCCGCTTT   |
|               | Reverse | GCAGGATAGGTATGGCGACC    |
| Oxct1         | Forward | GCCCTGCATAAAGGGTGTG     |
|               | Reverse | GCAAGGTTGCACCATTAGGAAT  |
| Whrn          | Forward | CAGACAGCATCCGCTAAGAAC   |
|               | Reverse | ACTTTTCTCACACGGACCAG    |
| Lgals4        | Forward | GGTCGTGGTGAACGGAAATTC   |
|               | Reverse | GTGGAGGGTTGTACCCAGGA    |
| Lpin1         | Forward | CCTCCGCTCCCGAGAGAAA     |
|               | Reverse | CGTTGTCTCCCAACTTCATGT   |
| Pcx           | Forward | AATGTCCGGCGTCTGGAGTA    |
|               | Reverse | ACGCACGAAACACTCGGAT     |
| Wfs1          | Forward | CAAACACTACCTACGCCTTGC   |
|               | Reverse | GCTGCCAGGATTAGCCAGG     |
| C130080G10Rik | Forward | TGAGGATGCCATTGACAGG     |
|               | Reverse | GGGGTGAAAATGGGGTCTTGA   |
| Slc25a34      | Forward | ATGAAGCCAACCTCAGGCACAG  |
|               | Reverse | GCTGCAACAGAAGACACAAAG   |
| Mfap4         | Forward | GGCGTGTATCTCATCTACCCC   |
|               | Reverse | TCACTGAGCCGTTGAATCTTTT  |
| Agrn          | Forward | GCGGTA CTTGAAAGGCAAAGA  |
|               | Reverse | CTCCAAAGCCACCAATTACCA   |
| Bckdhb        | Forward | AGTGCCCTGGATAACTCATTAGC |
|               | Reverse | GCATCGGAAGACTCCACCAAA   |
| Tll1          | Forward | GAAGTGGGTCACTGACATTGAG  |
|               | Reverse | ACGTTGCGAATGGTTTGCAC    |
| Pdk4          | Forward | AGGGAGGTTCGAGCTGTTCTC   |
|               | Reverse | GGAGTGTTCACTAAGCGGTCA   |
| Ccng1         | Forward | ACA ACTGACTCTCAGAACTGC  |
|               | Reverse | CATTATCATGGGCCGACTCAAT  |
| Snai3         | Forward | CACTGCCACAGGCCGTATC     |
|               | Reverse | CTTGCCGCACACCTTACAG     |
| Lingo3        | Forward | GTGGGCGACAATGACCTGG     |
|               | Reverse | ACAGTGATGTGAGATTGCAGC   |
| Mtr           | Forward | ATGATCCAGCGGTACAACTAAG  |
|               | Reverse | CATCCGGTAGGCCAAGTGTTT   |
| Slc2a4        | Forward | AACTGGTCCTAGCTGTATTCT   |
|               | Reverse | CCAGCCACGTTGCATTGTA     |
| Txnip         | Forward | GGCCGGACGGGTAATAGTG     |
|               | Reverse | AGCGCAAGTAGTCCAAAGTCT   |
| Lgr6          | Forward | ATCATGCTGTCCGCTGACTG    |

|         |         |                         |
|---------|---------|-------------------------|
|         | Reverse | ACTGAGGTCTAGGTAAGCCGT   |
| Atcayos | Forward | GGCTTTTCTTCTGACCTGGGA   |
|         | Reverse | TGTACCAGCACGGGTTCTTT    |
| Ppm1k   | Forward | TTATCAGCGGCCTTCATTACTTT |
|         | Reverse | GGATGGAGCTTAACAACACTCTC |
| Per3    | Forward | AACACGAAGACCGAAACAGAAT  |
|         | Reverse | CTCGGCTGGGAAATACTTTTTCA |
| Rab6b   | Forward | AACCCGCTGCGAAAATTCAAG   |
|         | Reverse | CGGTCTTCCAAGTACATGGTTT  |
| Lama5   | Forward | CTGGCGGAGATCCCAATCAG    |
|         | Reverse | GTGTGACGTTGACCTCATTGT   |
| Lpl     | Forward | TTGCCCTAAGGACCCCTGAA    |
|         | Reverse | TTGAAGTGGCAGTTAGACACAG  |
| Nrep    | Forward | CCCCACCTCTGTTAGGGTA     |
|         | Reverse | AAAGCCTGCATTTTCGGCAG    |
| Sntb1   | Forward | AGCGGACTGCTGGAAGTTTT    |
|         | Reverse | GCAGAACGAACCATTGGTGG    |
| Arntl   | Forward | ACAGTCAGATTGAAAAGAGGCG  |
|         | Reverse | GCCATCCTTAGCACGGTGAG    |
| Hspa5   | Forward | ACTTGGGGACCACCTATTCTC   |
|         | Reverse | GTTGCCCTGATCGTTGGCTA    |
| Scd1    | Forward | TTCTTGCGATACTCTGGTGC    |
|         | Reverse | CGGGATTGAATGTTCTTGTCTG  |
| Cmya5   | Forward | CAGACAGCACTCTCCTGAGG    |
|         | Reverse | AGTGGTATAGACAGGTCTGTTGG |
| Gm36827 | Forward | GGAGTCTGTGGAATGCAGGG    |
|         | Reverse | GGTCACATGGTTGCTCGGTA    |
| Mest    | Forward | AGAGTGGTGGGTCCAAGTAGG   |
|         | Reverse | AAGCACAACCTATCTCAGGGCT  |
| Gsn     | Forward | TCACGGGTGATGCCTATGTCA   |
|         | Reverse | AGCCAATAGTGGAGGTCATACTG |
| Acot2   | Forward | GTTGTGCCAACAGGATTGGAA   |
|         | Reverse | GCTCAGCGTCGCATTTGTC     |
| mt-Co3  | Forward | TTAACCCTTGGCCTACTCACC   |
|         | Reverse | CAATAGGAGTGTGGTGGCCTT   |
| Tubb4b  | Forward | CACTTACCACGGAGATAGCGA   |
|         | Reverse | ACCTTCTGTGTAGTGCCCCTT   |
| Tuba4a  | Forward | ATGCGCGAGTGCATTTICAG    |
|         | Reverse | TCCACCAATGGTCTTATCGCT   |
| Itga9   | Forward | TGCTTTCAGTGTGACGAGA     |
|         | Reverse | TTAAAGGACACGTTGGCATCATA |
| Tuba8   | Forward | ATCGGTCCATGTGGGTCAAG    |
|         | Reverse | TGAGTGCCAAAGGTTCCATCC   |
| Inka2   | Forward | GGGATGGCTTGCAGGATCAG    |

|               |         |                         |
|---------------|---------|-------------------------|
|               | Reverse | AGCTGTTCCAATGCCGTCTG    |
| Appl2         | Forward | ACTGGCAGACACTATGGTTCT   |
|               | Reverse | CTGGCAAGTCCAAAGAGATCC   |
| Gas5          | Forward | GGAAGCTGGATAACAGAGCGA   |
|               | Reverse | GGTATTCCTTGTAATGGGACCAC |
| Xdh           | Forward | ATGACGAGGACAACGGTAGAT   |
|               | Reverse | TCATACTTGGAGATCATCACGGT |
| Rgma          | Forward | CCACACCTCAGGACTTTCACA   |
|               | Reverse | AGACGGAAGTTCGTCCATTTC   |
| 2210407C18Rik | Forward | AAAGCCTCCTCACAGTTTTTGT  |
|               | Reverse | TCCATTTTCACACGTAGCTTGT  |
| Myom2         | Forward | ACCACCCAGTCATCCTCCC     |
|               | Reverse | CGTAAGAAGCCGCTTGAGACC   |
| Ky            | Forward | CTGCTGCAAAACCGAGGAG     |
|               | Reverse | GGTTGTCGTAGGAGGTGATGA   |
| Shld1         | Forward | GTGTGACACCAGCAGTTATGA   |
|               | Reverse | AGCCAGAAGTTCTCAGAGTCC   |
| Cyp1a1        | Forward | CAATGAGTTTGGGGAGGTTACTG |
|               | Reverse | CCCTTCTCAAATGTCCTGTAGTG |
| Actc1         | Forward | CTGGATTCTGGCGATGGTGTA   |
|               | Reverse | CGGACAATTTACGTTTCAGCA   |
| Plcd3         | Forward | GGCTACGGGCACTGAAGAAG    |
|               | Reverse | GCTGCACGAAGAATATGTGCTT  |
| Adam19        | Forward | CTCCGCTACAGCATGAACTCA   |
|               | Reverse | GCAAAAAGGTGCTCGTTCTTC   |
| Ntsr2         | Forward | CGCGCTCTATTCGCTCATCTT   |
|               | Reverse | CACAGCTCACGCACGAAGTAA   |
| Egln3         | Forward | AGGCAATGGTGGCTTGCTATC   |
|               | Reverse | GCGTCCCAATTCTTATTCAGGT  |

---

**Table S2. Reagents.**

| Name                                                              | Company                                         | Catalog No. |
|-------------------------------------------------------------------|-------------------------------------------------|-------------|
| Triton X-100                                                      | Sigma-Aldrich                                   | T9284       |
| NaCl                                                              | Sigma-Aldrich                                   | S7653       |
| KCl                                                               | Sigma-Aldrich                                   | P9541       |
| MgCl <sub>2</sub>                                                 | Sigma-Aldrich                                   | M8266       |
| CaCl <sub>2</sub>                                                 | Sigma-Aldrich                                   | C1016       |
| Glucose                                                           | Sigma-Aldrich                                   | G8270       |
| HEPES                                                             | Sigma-Aldrich                                   | PHR1428     |
| NaH <sub>2</sub> PO <sub>4</sub>                                  | Sigma-Aldrich                                   | S8282       |
| BDM                                                               | Sigma-Aldrich                                   | B0753       |
| Taurine                                                           | Sigma-Aldrich                                   | T8691       |
| EDTA                                                              | Sigma-Aldrich                                   | EDS         |
| MgCl <sub>2</sub>                                                 | Sigma-Aldrich                                   | M8266       |
| Glutaraldehyde                                                    | Sigma-Aldrich                                   | G5882       |
| Collagenase 2                                                     | Worthington                                     | LS004176    |
| laminin                                                           | Thermo Scientific,                              | 23017-15    |
| Rhod-4AM                                                          | AAT bioquest                                    | 21121       |
| MM4-64                                                            | AAT bioquest                                    | 21487       |
| MitoTracker                                                       | ThermoFisher Scientific                         | M7512       |
| Hematoxylin and eosin Kit                                         | Beyotime biotech                                | C0105M      |
| TUNEL Kit                                                         | Beyotime biotech                                | C1089       |
| HBSS                                                              | ThermoFisher Scientific,<br>Pittsburgh, PA, USA | 14175103    |
| DNase                                                             | Worthington, Lakewood,<br>NJ, USA               | 9003-98-9   |
| RNase                                                             | Worthington, Lakewood,<br>NJ, USA               | 9001-99-4   |
| BCA kit                                                           | ThermoFisher Scientific                         | A53227      |
| paraformaldehyde(PFA)                                             | Sigma-Aldrich                                   | 158127      |
| 4',6-diamidino-2-phenylindole(DAPI)                               | ThermoFisher Scientific)                        | D3571       |
| PureLink RNA Micro Scale Kit                                      | Life Technologies,<br>Carlsbad, California, USA | 12183016    |
| PrimeScript <sup>TM</sup> reagent kit                             | Takara Bio, Kusatsu, Japan                      | RR037A      |
| SYBR Green Power Premix Kits                                      | Applied Biosystems, Foster<br>City, California  | 4368577     |
| RIPA lysis buffer                                                 | Beyotime, Shanghai, China                       | P0013B      |
| NEB Next <sup>®</sup> Ultra <sup>TM</sup> RNA Library<br>Prep Kit | NEB, USA                                        | E7760       |
| TruSeq PE Cluster Kit                                             | Illumina                                        | v3-cBot-HS  |

**Table S3. Antibodies.**

| Name                                                  | Company                                                 | Catalog No.  |
|-------------------------------------------------------|---------------------------------------------------------|--------------|
| cardiac troponin T                                    | Abcam                                                   | ab8295       |
| sarcomeric $\alpha$ -actinin                          | Abcam                                                   | ab9465       |
| Ki67                                                  | Abcam                                                   | ab15580      |
| phosphorylated histone H3                             | Milipore                                                | 06-570       |
| aurora B                                              | Abcam                                                   | ab2254       |
| GAPDH                                                 | Abcam                                                   | ab8245       |
| Dylight 800- labeled affinity<br>secondary antibodies | Kirkegaard & Perry<br>Laboratories, Gaithersburg,<br>MD | 072-07-15-06 |

**Table S4. PA diameter (D) at P14 and P21.**

|            | <b>N</b> | <b>VO</b>          | <b>Sham</b>       | <b><i>p</i></b> |
|------------|----------|--------------------|-------------------|-----------------|
| <b>P14</b> | <b>6</b> | <b>0.777±0.052</b> | <b>0.76±0.079</b> | <b>0.704</b>    |
| <b>P21</b> | <b>6</b> | <b>0.962±0.090</b> | <b>0.95±0.060</b> | <b>0.713</b>    |

**Figure S1. RVSV and RVSP at different time points.**

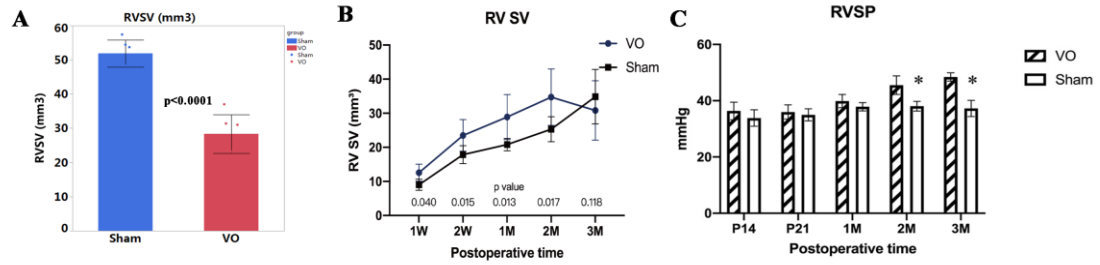

(A) RVSV was significantly reduced at 12 months after surgery.  $P < 0.0001$ ,  $n = 6$  mice, student  $t$ -test. (B) Changes in RVSV over time,  $n = 6$  mice, student  $t$ -test. (C) Histogram of RVSP in different time points,  $n = 6$  mice, Student's  $t$ -test.



**Supplemental Video Legend:**

**Video S1. Surgical process of VO.** Best viewed with Windows Media Player.
